# Supplementary material for: PHD finger protein 20-like protein 1 (PHF20L1) in ovarian cancer: from its overexpression in tissue to its upregulation by the ascites microenvironment
Source: Cancer Cell Int. 2022 Jan 6;22:6. doi: 10.1186/s12935-021-02425-6 (PMC8740351; doi:10.1186/s12935-021-02425-6)
Supplement: Supplementary file 6 — Additional file 6: Table S1. General data of the patients whose tissues were used in this study. [file 12935_2021_2425_MOESM6_ESM.xlsx]

## Sheet: Hoja1
Additional file 6 Table S1. General data of the patients whose tissues were used in this study
	Positivity percentage	Age at diagnostic	Clinical Stage	Histological Subtype	Status	1	2	3	CA125 (Serum)	Progression-free survival (months)	Overall survival (months)	A	B	Immunoreactive Score
1	93.92	59	8	1	D	88.63	5.19	0.1	1121	32.99	43.7	4	1	4
2	93.94	44	8	1	D	88.8	5.04	0.1	11.4	32.23	74.51	4	1	4
3	84.59	47	1	3	A	74.48	9.93	0.18	61.1	92.25	104.08	4	1	4
4	56.13	65	9	1	D	56.13	0	0	3161	19.75	83.32	3	1	3
5	68.17	33	9	1	D	37.53	24.71	5.93	2005	10.61	12.78	3	3	9
6	96.53	56	8	1	A	58.56	28.7	9.27	1068	4.37	54.47	4	2	8
7	44.04	36	9	3	D	41.6	2.44	0	4998	13.01	20.67	2	1	2
8	87.53	62	3	1	D	54.04	29.35	4.14	24.7	16.62	18.07	4	2	8
9	95.57	43	6	2	A	47.41	45.12	3.04	381	41.86	54.77	4	2	8
10	98.43	65	8	1	D	41.13	33	24.3	1779	17.51	56.77	4	3	12
11	75.08	50	8	1	A	74.38	0.7	0	231	26.41	85.26	3	1	3
12	94.26	52	8	4	D	74.8	19.06	0.4	74.9	7.06	45.01	4	2	8
13	94.22	40	8	3	D	74.11	20.11	0	344	3.71	8.9	4	2	8
14	58.475	33	8	5	A	11.63	19.397	27.448	771	76.19	76.68	3	3	9
15	93.22	58	8	1	D	79.38	13.77	0.07	5958	15.01	132.37	4	1	4
16	92.24	59	8	1	A	89.05	3.19	0	14.2	32.92	55.06	4	1	4
17	95.988	52	10	4	D	40.36	39.53	16.098	214	3.42	9.69	4	3	12
18	99.4	49	8	3	D	98.49	0.9	0	210	1.35	5.26	4	1	4
19	48.44	38	8	1	A	43.86	3.88	0.7	246	31.18	185.17	2	1	2
20	61.63	45	10	1	D	30.23	17.1	14.31	2932	6.05	25.99	3	2	6
21	98.06	28	8	1	D	30.08	59.87	8.11	596	6.47	42.68	4	2	8
22	91.11	67	8	1	D	89.69	1.42	0	120	18.4	86.54	4	1	4
23	75.45	62	6	1	D	36.63	14.52	24.29	499	5.62	11.47	3	3	9
24	93.11	50	7	4	D	50.57	33.65	8.89	91.7	16.92	26.84	4	2	8
25	94.42	52	9	1	D	25.21	20.32	48.9	1267	7.1	23.29	4	3	12
26	99.44	58	1	4	A	60.14	37.2	2.1	31.3	52.9	53.95	4	2	8
27	29.88	48	8	3	D	29.48	0.4	0	365	23.62	42.55	1	1	1
28	70.25	33	8	2	D	43.52	22.01	4.72	3067	37.78	53.88	3	2	6
29	88.55	45	8	3	D	75.97	12.48	0.1	176	46.46	103.89	4	1	4
H1	10.66	61				10.215	0.424	0.021				1	1	1
H2	21.13					21.06	0.07	0				2	1	2
Br	91.19											2	2	4
Cerv	97.31											3	1	3
